# Supplementary material for: Identification of Tools for the Functional and Subjective Assessment of Patients in an Aquatic Environment: A Systematic Review
Source: MDPI journal article supplement (doi:10.3390/ijerph17165690), 2020-08-06
Supplement: s1 [file s1]

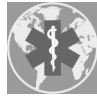

# Supplementary Materials: Identification of Tools for the Functional and Subjective Assessment of Patients in an Aquatic Environment: A Systematic Review.

Antonio Cuesta-Vargas <sup>1,2</sup>, Jaime Martin-Martin <sup>2,3,\*</sup>, Manuel Gonzalez-Sanchez <sup>1,2</sup>, Jose Antonio Merchan-Baeza <sup>2,4</sup> and David Pérez-Cruzado <sup>2,5</sup>

Table S1. Internal validity analysis (Stard Checklist).

| Stand checklist | Cuesta-Vargas et al. 2013 [28] | Cuesta-Vargas et al. 2013 [29] | Cuesta-Vargas et al. 2011 [15] | Nagle et al. 2016 [25] | Gauda et al. 2010 [16] | Louder et al. 2017 [31] | Colado et al. 2009 [30] | Matsumoto et al. 2017 [26] | Matsumoto et al. 2012 [18] | Matsumoto et al. 2013 [20] | Matsumoto et al. 2008 [19] | Chevutski et al. 2007 [17] | Alberton et al. 2010. [21] | Castillo-Lozano et al. 2014 [27] |
|-----------------|--------------------------------|--------------------------------|--------------------------------|------------------------|------------------------|-------------------------|-------------------------|----------------------------|----------------------------|----------------------------|----------------------------|----------------------------|----------------------------|----------------------------------|
| 1               | -                              | -                              | -                              | •                      | •                      | •                       | -                       | -                          | -                          | -                          | -                          | -                          | -                          | -                                |
| 2               | •                              | •                              | •                              | •                      | •                      | •                       | •                       | •                          | •                          | •                          | •                          | •                          | •                          | •                                |
| 3               | •                              | •                              | •                              | •                      | •                      | •                       | •                       | •                          | •                          | •                          | •                          | •                          | •                          | •                                |
| 4               | •                              | •                              | •                              | •                      | •                      | •                       | •                       | •                          | •                          | •                          | •                          | •                          | •                          | •                                |
| 5               | •                              | •                              | •                              | •                      | •                      | •                       | •                       | •                          | •                          | •                          | •                          | •                          | •                          | •                                |
| 6               | •                              | •                              | •                              | •                      | •                      | •                       | •                       | •                          | •                          | •                          | •                          | •                          | •                          | •                                |
| 7               | •                              | •                              | •                              | •                      | •                      | •                       | •                       | •                          | •                          | •                          | •                          | •                          | •                          | •                                |
| 8               | -                              | -                              | -                              | -                      | -                      | -                       | -                       | -                          | -                          | -                          | -                          | -                          | -                          | -                                |
| 9               | -                              | -                              | •                              | •                      | •                      | •                       | •                       | •                          | •                          | •                          | •                          | •                          | -                          | •                                |
| 10 <sub>a</sub> | •                              | •                              | •                              | -                      | •                      | •                       | •                       | •                          | •                          | •                          | •                          | •                          | •                          | •                                |
| 10 <sub>b</sub> | •                              | •                              | •                              | -                      | •                      | •                       | •                       | •                          | •                          | •                          | •                          | •                          | •                          | •                                |
| 11              | •                              | •                              | -                              | -                      | •                      | -                       | -                       | -                          | •                          | •                          | -                          | •                          | •                          | -                                |
| 12 <sub>a</sub> | -                              | •                              | -                              | •                      | -                      | -                       | -                       | -                          | -                          | •                          | -                          | •                          | •                          | -                                |
| 12 <sub>b</sub> | -                              | -                              | -                              | •                      | -                      | -                       | -                       | -                          | -                          | •                          | -                          | -                          | •                          | -                                |
| 13 <sub>a</sub> | -                              | -                              | -                              | •                      | -                      | -                       | -                       | -                          | -                          | •                          | -                          | -                          | •                          | -                                |
| 13 <sub>b</sub> | -                              | -                              | •                              | -                      | -                      | -                       | -                       | -                          | -                          | -                          | -                          | -                          | -                          | -                                |
| 14              | •                              | •                              | •                              | -                      | -                      | -                       | -                       | -                          | -                          | -                          | -                          | •                          | -                          | •                                |
| 15              | -                              | -                              | -                              | -                      | -                      | -                       | -                       | -                          | -                          | -                          | -                          | -                          | -                          | -                                |
| 16              | •                              | -                              | •                              | •                      | •                      | •                       | •                       | •                          | •                          | •                          | -                          | -                          | •                          | •                                |
| 17              | •                              | -                              | •                              | •                      | •                      | •                       | •                       | •                          | •                          | •                          | -                          | -                          | •                          | •                                |
| 18              | -                              | -                              | •                              | -                      | -                      | •                       | •                       | -                          | -                          | -                          | -                          | -                          | •                          | -                                |
| 19              | -                              | -                              | -                              | -                      | -                      | -                       | -                       | -                          | -                          | -                          | -                          | -                          | -                          | -                                |
| 20              | •                              | •                              | -                              | •                      | •                      | •                       | -                       | •                          | •                          | •                          | •                          | •                          | •                          | •                                |
| 21 <sub>a</sub> | -                              | -                              | -                              | -                      | •                      | -                       | -                       | -                          | -                          | -                          | -                          | -                          | •                          | -                                |
| 21 <sub>b</sub> | -                              | -                              | -                              | -                      | -                      | -                       | -                       | -                          | -                          | -                          | -                          | -                          | •                          | •                                |
| 22              | -                              | -                              | -                              | -                      | •                      | •                       | •                       | •                          | •                          | •                          | -                          | •                          | •                          | •                                |
| 23              | -                              | -                              | -                              | -                      | -                      | -                       | •                       | -                          | -                          | -                          | -                          | -                          | -                          | -                                |
| 24              | •                              | •                              | •                              | -                      | -                      | -                       | -                       | -                          | -                          | -                          | -                          | -                          | -                          | -                                |
| 25              | -                              | -                              | -                              | -                      | -                      | -                       | •                       | -                          | -                          | -                          | -                          | -                          | -                          | -                                |

|              |           |           |           |           |           |           |           |           |           |           |           |           |           |
|--------------|-----------|-----------|-----------|-----------|-----------|-----------|-----------|-----------|-----------|-----------|-----------|-----------|-----------|
| 26           | ●         | ●         | ●         | ●         | -         | -         | -         | ●         | ●         | -         | -         | -         | ●         |
| 27           | ●         | ●         | -         | ●         | ●         | ●         | ●         | ●         | ●         | ●         | -         | ●         | ●         |
| 28           | -         | -         | -         | -         | -         | -         | -         | -         | -         | -         | -         | -         | -         |
| 29           | -         | -         | -         | -         | -         | -         | -         | -         | -         | -         | -         | -         | -         |
| 30           | -         | ●         | -         | ●         | ●         | -         | -         | ●         | -         | -         | -         | ●         | ●         |
| <b>TOTAL</b> | <b>15</b> | <b>16</b> | <b>16</b> | <b>15</b> | <b>17</b> | <b>15</b> | <b>15</b> | <b>15</b> | <b>15</b> | <b>16</b> | <b>10</b> | <b>16</b> | <b>17</b> |

Table S2. Characteristics of included studies.

| Article                      | Task                                                                               | Environments                                                                    | Sample Size (n)               | Variable                                               | Criteria Validity                                                                                                                                                                                                                                                                                                                                     | Reliability or Measurement Error (ICC)                                          |
|------------------------------|------------------------------------------------------------------------------------|---------------------------------------------------------------------------------|-------------------------------|--------------------------------------------------------|-------------------------------------------------------------------------------------------------------------------------------------------------------------------------------------------------------------------------------------------------------------------------------------------------------------------------------------------------------|---------------------------------------------------------------------------------|
| Alberton et al. 2011 [21]    | Walking                                                                            | Water and dry                                                                   | Water: n = 14<br>Land: n = 11 | Cardiorespiratory response                             | Significant differences between environments and cadence ( $p < 0.001$ )                                                                                                                                                                                                                                                                              | Neuromuscular responses<br>RF = 0.942<br>VL = 0.920<br>SM = 0.819<br>BF = 0.764 |
|                              |                                                                                    |                                                                                 |                               | Neuromuscular response                                 | No differences between dry and land ( $p > 0.100$ )<br>Differences at maximal effort ( $p = 0.003$ )                                                                                                                                                                                                                                                  |                                                                                 |
|                              |                                                                                    |                                                                                 |                               | Kinematic response                                     | Significant differences between environments and cadence ( $p < 0.001$ )                                                                                                                                                                                                                                                                              |                                                                                 |
| Chevuttschi et al. 2007 [17] | Walking                                                                            | Water and dry                                                                   | n = 7                         | Neuromuscular responses                                | Significant differences in ES and S between environments<br>No significant differences in RF between environments<br>There was no significant difference in VO <sub>2</sub> , RER, HR and VE among the 3 conditions                                                                                                                                   |                                                                                 |
| Masumoto et al. 2012 [18]    | Walking                                                                            | Water current, walking in water without a water current and walking on dry land | n = 7                         | Cardiorespiratory responses<br>Physiological responses | The VO <sub>2</sub> , RER, HR, VE, RPE-Br and RPE-Legs obtained while walking in water with a current were significantly higher than those obtained while walking in water without a current, at all speeds<br><br>There was no significant differences in the SBP and DBP obtained at rest and before exercise among the 3 conditions ( $p > 0.05$ ) |                                                                                 |
| Masumoto et al. 2008 [19]    | Walking at 3 different speeds. Water (1,2; 1,8; 2,4 Km/h) Dry (2,4; 3,6; 4,8 Km/h) | Water and dry                                                                   | n = 9                         | Neuromuscular responses                                | The %MVCs obtained from the muscles tested while walking in water were all significantly lower than when walking on dry land at all speed cond itions<br><br>In contrast, the %MVCs from the VM, RF, BF and GA while walking in water were significantly higher than when walking on dry land at the same speeds                                      |                                                                                 |
|                              |                                                                                    |                                                                                 |                               | Cardiorespiratory responses                            | There was no significant difference in the VO <sub>2</sub> and HR between environments at moderate and fast speeds, however, in walking speed there VO <sub>2</sub> and HR were significantly higher                                                                                                                                                  |                                                                                 |
|                              |                                                                                    |                                                                                 |                               | Rating of perceived exertion                           | There was no significant differences                                                                                                                                                                                                                                                                                                                  |                                                                                 |

|                                  |                                                                                     |                                            |          |                                                |                                                                                                                                                                                                                                                            |                                                                                                                                                                                          |
|----------------------------------|-------------------------------------------------------------------------------------|--------------------------------------------|----------|------------------------------------------------|------------------------------------------------------------------------------------------------------------------------------------------------------------------------------------------------------------------------------------------------------------|------------------------------------------------------------------------------------------------------------------------------------------------------------------------------------------|
| Masumoto et al. 2013 [20]        | Walking                                                                             | Water and dry                              | $n = 8$  | Neuromuscular responses                        | There was no differences in muscle activity between environments                                                                                                                                                                                           |                                                                                                                                                                                          |
| Masumoto et al. 2017 [26]        | Deep Water Running                                                                  | Water and dry                              | $n = 11$ | Physiological responses                        | VO <sub>2</sub> max and HRmax during DWR were significantly lower than on dry.<br>Significant differences in muscle activity at submaximal and maximal efforts and intensity.                                                                              |                                                                                                                                                                                          |
|                                  |                                                                                     |                                            |          | Neuromuscular responses                        | Muscle activity from RF, BF, TA and GA during DWR were significantly lower than that of TMR, regardless of exercise intensity                                                                                                                              |                                                                                                                                                                                          |
|                                  |                                                                                     |                                            |          | Rating of perceived exertion                   | There were no significant differences                                                                                                                                                                                                                      |                                                                                                                                                                                          |
| Cuesta-Vargas et al. 2011 [15]   | Deep water running and cycle ergometry                                              | Water and dry                              | $n = 23$ | Maximal and submaximal physiological responses | Mean maximal and submaximal HRs were significantly lower in the DWR test.<br>No significant differences in blood lactate                                                                                                                                   |                                                                                                                                                                                          |
|                                  | Deep water running in three different protocols: a) <8 min, b) 8–12 min, c) >12 min |                                            |          |                                                | Maximum HR was significantly lower during the long protocol<br>Maximal running cadencies were lower on the long protocol                                                                                                                                   | Short Deep Water Running protocol:<br>VO <sub>2</sub> = 0.90<br>VCO <sub>2</sub> = 0.92<br>VO <sub>2</sub> = 0.84<br>VE = 0.89<br>RER = 0.65<br>HR = 0.70<br>VO <sub>2</sub> peak = 0.73 |
| Gayda et al. 2010 [16]           | Treadmill                                                                           | Water and dry                              | $n = 24$ | Cardiorrespiratory responses                   | Main peak cardiopulmonary responses obtained during treadmill were significantly higher compared with those obtained on the DWR                                                                                                                            | HRpeak = 0.82<br>O <sub>2</sub> pulse = 0.77                                                                                                                                             |
| Nagle et al. 2016 [25]           | Deep water running                                                                  | Water and dry                              | $n = 23$ | Cardiorrespiratory responses                   | A moderate correlation was found between DWR and LTM (land-based treadmill) for VO <sub>2</sub> peak ( $r = 0.60; p < 0.01$ ), HRpeak ( $r = 0.58; p < 0.01$ ) and O <sub>2</sub> pulse ( $r = 0.63, p < 0.01$ )                                           |                                                                                                                                                                                          |
| Castillo-Lozano et al. 2014 [27] | Shoulder scaption                                                                   | Water and dry (different planes and speed) | $n = 16$ | Neuromuscular response                         | Significant differences in:<br><u>During flexion</u> , the P and MD at 90/s and 45/s<br><u>During abduction</u> , the P and LD at the 3 Speeds (30/s, 45/s and 90/s)<br><u>During scaption</u> , the P and MD muscle at the 3 speeds (30/s, 45/s and 90/s) |                                                                                                                                                                                          |
| Cuesta-Vargas et al. 2013 [28]   | Sit to stand                                                                        | Water and dry                              | $n = 10$ | Neuromuscular responses                        | The %MVC contraction was different for all muscles during between environments                                                                                                                                                                             |                                                                                                                                                                                          |
| Cuesta-Vargas et al. 2013 [29]   | Time Get up and go                                                                  | Water and dry                              | $n = 10$ | Neuromuscular responses                        | The %MVC was significantly different ( $p < 0.05$ ) for majority of the muscles tested during the TUG (RF, BF, TA, S, GA and ES)                                                                                                                           |                                                                                                                                                                                          |

|                            |      |               |               |                     |                                                                                                                                                                                                                                                            |
|----------------------------|------|---------------|---------------|---------------------|------------------------------------------------------------------------------------------------------------------------------------------------------------------------------------------------------------------------------------------------------------|
| Colado et al.<br>2009 [30] | Jump | Water and dry | <i>n</i> = 12 | Kinematic responses | Maximum concentric force was greater in water<br>Peak impact force was lower for the aquatic jumps                                                                                                                                                         |
|                            |      |               |               | Kinematic responses | Unweighting times were longer and propulsive times were shorter in water versus land                                                                                                                                                                       |
| Louder et al.<br>2017 [31] | Jump | Water and dry | <i>n</i> = 67 |                     | Unweighting times and percent of time in unweighting were greater in older adults<br>All measures of power, amortization rate and force (BW) were greater in water versus land.                                                                            |
|                            |      |               |               | Kinetic responses   | Maximum shank flexion angle, peak shank extension velocity and peak dorsiflexion velocity were greater in water versus land<br>Maximum plantarflexion angle, peak thigh flexion velocity and peak shank flexion velocity were greater on land versus water |

BF, Biceps femoris; BW, body weight; DBP, Diastolic blood pressure; DWR, Deep water running; ES, Erector spinae; GA, Gastrocnemius; HR, Heart rate; LT, latissimus dorsi; MD, middle deltoid; MVC, Maximum voluntary contraction; P, Pectoralis; RF, Rectus femoris; RER, respiratory; RPE, rate of perceived exertion; exchange ratio; S, Soleus; SBP, Systolic blood pressure; ST, Semitendinosus; TA, Tibialis anterior; TMR, treadmill running; VE, Ventilation; VL, Vastus lateralis; VM, Vastus medialis.

**Table S3.** Structural Characteristics of the questionnaires.

| Questionnaire                                                           | Acronym   | N° Items                             | Sub-category                                                                                                                                                                                                                                                                                                                                                                                                                                        | Time to Complete | Item Rated                                    | Cutoff                                                                                                                                                                                                                 | Cost          |
|-------------------------------------------------------------------------|-----------|--------------------------------------|-----------------------------------------------------------------------------------------------------------------------------------------------------------------------------------------------------------------------------------------------------------------------------------------------------------------------------------------------------------------------------------------------------------------------------------------------------|------------------|-----------------------------------------------|------------------------------------------------------------------------------------------------------------------------------------------------------------------------------------------------------------------------|---------------|
| <b>Activities-specific Balance Confidence Scale [19,36,39,42,43-52]</b> | ABC scale | 16                                   | Balance confidence                                                                                                                                                                                                                                                                                                                                                                                                                                  | 5–10 min         | 0–100                                         | Scores <67% indicates a risk for falling                                                                                                                                                                               | Not specified |
| <b>Arthritis Impact Measurement Scale [53-56]</b>                       | AIMS2     | 78                                   | Mobility Level<br>Walking and Bending<br>Hand and Finger Function<br>Arm Function<br>Self- Care Tasks<br>Household Tasks<br>Social Activity<br>Support from Family and Friends<br>Arthritis Pain<br>Work<br>Level of Tension<br>Mood<br>Satisfaction with health area                                                                                                                                                                               | 20 min           | Yes/No<br>4–5 and 6<br>point Likert<br>scales | Not specified                                                                                                                                                                                                          | Free          |
| <b>Assessment of Motor and Process Skills [57-63]</b>                   | AMPS      | 16 motor skills<br>20 process skills | Motor skills:<br><ul style="list-style-type: none"> <li>• Body position</li> <li>• Obtaining and holding objects</li> <li>• Moving self and objects</li> <li>• Sustaining performance</li> <li>• Process skills:<br/> <ul style="list-style-type: none"> <li>• Sustaining performance</li> <li>• Applying knowledge</li> <li>• Temporal organization</li> </ul> </li> <li>• Organizing Space and Objects</li> <li>• Adapting Performance</li> </ul> | 30–40 min        | 1–6                                           | Scores below 2.0 logit for process scale indicate increased need for assistance to live in the community<br>Scores below 1.0 logit for motor scale indicate increased need for assistance to live in the community [2] | 795\$         |
| <b>Assessment of Quality of Life Scale; [39,64,65]</b>                  | AQoL      | 15                                   | Illness<br>Independent living<br>Social relationships<br>Physical senses<br>Psychological wellbeing                                                                                                                                                                                                                                                                                                                                                 | 5 min            | A-D                                           | -                                                                                                                                                                                                                      | Free          |
| <b>Arthritis Self-Efficacy Scale [65]</b>                               | ASES      | 20                                   | Pain<br>Function<br>Other symptoms                                                                                                                                                                                                                                                                                                                                                                                                                  | 5 min            | 1–10                                          | -                                                                                                                                                                                                                      | -             |
| <b>Berg Balance Scale [34,36,66-70]</b>                                 | BBS       | 14                                   | Balance and functional mobility                                                                                                                                                                                                                                                                                                                                                                                                                     | 15–20 min        | 0–4                                           | Score of 56 indicates functional balance<br>Score of <45 indicates individuals may be at greater risk of falling [3]                                                                                                   | Free          |
| <b>Child Health Assessment Questionnaire [71,72]</b>                    | CHAQ      | 16                                   | Family cohesion<br>Global health<br>Physical functioning<br>Self-esteem                                                                                                                                                                                                                                                                                                                                                                             | 30–40 min        | Yes/No items<br><br>Multiple answers          | Not specified                                                                                                                                                                                                          | Free          |

|                                                                           |        |                                                                |                                                                                                                                                                                            |          |                                                                |                                                                                                                                                                                  |               |
|---------------------------------------------------------------------------|--------|----------------------------------------------------------------|--------------------------------------------------------------------------------------------------------------------------------------------------------------------------------------------|----------|----------------------------------------------------------------|----------------------------------------------------------------------------------------------------------------------------------------------------------------------------------|---------------|
| <b>Chronic Venous Insufficiency Questionnaire [73-75]</b>                 | CIVIQ2 | 4                                                              | Psychological functioning<br>Physical functioning<br>Social functioning<br>Pain                                                                                                            | 10 min   | 1–5                                                            | Not specified                                                                                                                                                                    | Free          |
| <b>Client Satisfaction Questionnaire [76-78]</b>                          | CSQ    | 3,4,8,18 and 31 versions                                       | None                                                                                                                                                                                       | 10 min   | 1–4                                                            | Not specified                                                                                                                                                                    | Free          |
| <b>Disease Activity Score [79-82]</b>                                     | DAS    | 21 and 28 versions                                             | Proximal interphalangeal joints<br>Metacarpophalangeal joints<br>Wrists<br>Elbows<br>Shoulders<br>Knees                                                                                    | 10 min   | 0–100                                                          | < 2.6 Remission of disease severity<br>≥ 2.6 - < 3.2 Low disease severity<br>≥ 3.2 - ≤ 5.1 Moderate disease severity<br>> 5.1 High disease severity                              | Free          |
| <b>EuroQol-5 Dimension questionnaire [83,84]</b>                          | EQ-5D  | 6                                                              | Mobility<br>Self-care<br>Usual activities<br>Pain/discomfort<br>Anxiety/depression                                                                                                         | <5 min   | 1)None<br>2)Mild to moderate<br>3)Severe                       | -                                                                                                                                                                                | Not specified |
| <b>Falls Efficacy Scale [85-88]</b>                                       | FES-I  | 16                                                             | Activity<br>Participation                                                                                                                                                                  | 10 min   | 1–4                                                            | Scores between 16–19 indicate low concern about falls<br>Scores between 20–27 indicate moderate concern about falls<br>Scores between 28–64 indicate high concern about falls[4] | Not specified |
| <b>Fibromyalgia Impact Questionnaire [89-92]</b>                          | FIQ    | 10                                                             | -                                                                                                                                                                                          | 10 min   | Different rates:<br>0–3<br>0–7<br>0–5<br>Visual Analogue Scale | -                                                                                                                                                                                | Free          |
| <b>Generalized Anxiety Disorder Scale – 7 [92]</b>                        | GAD-7  | 7                                                              | Anxiety symptom levels                                                                                                                                                                     | ≥5 min   | 0–21                                                           | Anxiety symptom levels<br>0–4: minimal<br>5–9: mild<br>10–14: moderate<br>15–21: severe                                                                                          | Free          |
| <b>Health Assessment Questionnaire-modified [93-95]</b>                   | HAQ    | 41 questions<br>20: 0–3<br>Liknel scale<br>13 + 8<br>dicotomic | Vestirse y arreglarse/Dressing and grooming,<br>Levantarse/Arising,<br>Comer/Eating,<br>Caminar/Walking,<br>Higiene/Hygiene,<br>Alcanzar/Reach,<br>Agarrar/Grip,<br>Actividades/Activities | 5–10 min | 0–60                                                           | -                                                                                                                                                                                | Free          |
| <b>Knee Injury and Osteoarthritis Outcome Score Questionnaire [96-99]</b> | KOOS:  | 42 questions                                                   | Knee-related quality of life<br>Activities of daily living                                                                                                                                 | 10 min   | 0–100                                                          | Pain: <86.1<br>Symptoms: <85.7                                                                                                                                                   | free          |

|                                                                                       |           |    | Sport and recreation function<br>Symptoms<br>Pain                                                                                                                                                                                                                                                                                                         |           |       | ADL: <86.8<br>Sport/Rec: <85.0<br>QoL: <87.5 |          |
|---------------------------------------------------------------------------------------|-----------|----|-----------------------------------------------------------------------------------------------------------------------------------------------------------------------------------------------------------------------------------------------------------------------------------------------------------------------------------------------------------|-----------|-------|----------------------------------------------|----------|
| <b>Movement Disorder Society - Unified Parkinson's Disease Rating Scale [100-102]</b> | MDS-UPDRS | 50 | Non-motor experiences of daily living<br>Motor experiences of daily living<br>Motor function<br>Motor fluctuations and dyskinesia                                                                                                                                                                                                                         | 20–30 min | 0–200 | -3.5 / 4.5                                   | Free     |
| <b>Physical Activity Scale for the Elderly [103-108]</b>                              | PASE:     | 12 | Activities of Daily Living<br>General health                                                                                                                                                                                                                                                                                                              | <5min     | 0–400 | -                                            | free     |
| <b>Parkinson's Disease Questionnaire [109-112]</b>                                    | PDQ39:    | 39 | Mobility<br>Activities of daily living<br>Emotional well-being<br>Stigma<br>Social Support<br>Cognition<br>Communication<br>Bodily discomfort                                                                                                                                                                                                             | 10–20 Min | 0–100 | -                                            | Free     |
| <b>Quebec Back Pain Disability [113]</b>                                              | QBPDS     | 20 | Disability                                                                                                                                                                                                                                                                                                                                                | <5min     | 0–100 | -                                            | Free     |
| <b>Short Form-12 [114]</b>                                                            | SF-12     | 12 | 2 components: physical components.<br>mental components.<br>8 sub-scales<br>Physical health state<br>Mental health state<br>Physical Functioning<br>Role Limitations due to Physical Problems<br>General health perceptions<br>Vitality<br>Social Functioning<br>Role Limitations due to Emotional Problems<br>General Mental Health                      | 3–5 min   | 0–100 | -                                            | Not Free |
| <b>Short Form-36 [114-119]</b>                                                        | SF-36     | 36 | 2 components: physical components.<br>mental components.<br>8 sub-scales<br>Physical health state<br>Mental health state<br>Physical Functioning<br>Role Limitations due to Physical Problems<br>General health perceptions<br>Vitality<br>Social Functioning<br>Role Limitations due to Emotional Problems<br>General Mental Health<br>Health Transition | 10–45 Min | 0–100 | -                                            | Not Free |

|                                                                                      |        |    |                                                      |              |      |   |          |
|--------------------------------------------------------------------------------------|--------|----|------------------------------------------------------|--------------|------|---|----------|
| <b>Tampa Scale of Kinesiophobia [120]</b>                                            | TSK-13 | 13 | Kinesiophobia<br>activity avoidance<br>somatic focus | <10 min      | 0–52 | - | Free     |
| <b>Venous Clinical Severity Score [121]</b>                                          | VCSS   | 10 | Clinical severity                                    | < 5min       | 0–30 | - | Free     |
| <b>Western Ontario McMaster<br/>Universities Osteoarthritis Index [122-<br/>125]</b> | WOMAC  | 24 | Pain<br>Stiffness<br>Function                        | 10–20<br>min | 0–96 | - | Not free |

**Table S4.** Psychometric characteristics of the questionnaires.

| Questionnaires                                                | Reliability Test-Retest<br>(Respuesta al Ítem)<br>ICC | Internal consistency ( $\alpha$ -<br>Crombach) | Construct Validity                                                                                                                                                                                                                                  | Factor<br>Analysis | Sensitivity /<br>Specificity | SEM                   | MDC                      |
|---------------------------------------------------------------|-------------------------------------------------------|------------------------------------------------|-----------------------------------------------------------------------------------------------------------------------------------------------------------------------------------------------------------------------------------------------------|--------------------|------------------------------|-----------------------|--------------------------|
| <b>Activities-specific Balance<br/>Confidence Scale (ABC)</b> | 0.53 [19]–0.96 [36]                                   | 0.91 [42]–0.96 [43]                            | Functional gait assessment:<br>$r = 0.53$ (95% CI) [38]<br>Fear of falling Avoidance Behaviour<br>Questionnaire:<br>$r = -0.67$ (95% CI) [43]<br>Berg Balance Scale:<br>$r = 0.75$ (95% CI) [44]<br>Timed up & go test:<br>$r = 0.70$ (95% CI) [51] | 1 Factor           | 58%–<br>97%/96%–32%<br>[50]  | 6.81 [5]–1.19<br>[36] | 11.12 [13]–13.00<br>[48] |
| <b>Arthritis Impact Measurement<br/>Scale (AIMS)</b>          | 0.81–0.94 [53]                                        | 0.32 [16]–0.90 [55]                            | WOMAC<br>$r = 0.16$ –0.22 (95% CI) [54]<br>100 mm visual analog scale (VAS) for<br>pain<br>$r = 0.18$ –0.41 [95% CI] [54]<br>Range of motion<br>$r = 0.17$ –0.44 (95% CI) [54]                                                                      | 13 factors         |                              | 1.37 [55]             | 3.80 [56]                |
| <b>Assessment of Motor and<br/>Process Skills (AMPS)</b>      | 0.60 [36]–0.95 [57]                                   | 0.79 [22]–0.92 [57]                            | Pain frequency<br>$r = -0.30$ (95% CI) [58]<br>Pain intensity<br>$r = 0.36$ (95% CI) [59]<br>Disease duration<br>$r = 0.39$ (95% CI)                                                                                                                | 2 factors          | 67%–<br>81%/70%–72%<br>[63]  | 1.96 [61]             | -                        |
| <b>Assessment of Quality of Life<br/>Scale (AQLS)</b>         | 0.26–0.78 [39]                                        | 0.81 [39]                                      | EuroQol-5D<br>$r = 0.73$ –0.76 (95% CI) [65]<br>Health utilities index<br>$r = 0.79$ –0.82 (95% CI) [65]<br>SF-6D<br>$r = 0.77$ –0.80 (95% CI) [64]<br>Quality of Well-being<br>$r = 0.65$ –0.67 (95% CI) [64]                                      | 5 factors          | -                            | -                     | -                        |
| <b>Arthritis Self-Efficacy Scale<br/>[ASES]</b>               | 0.75–0.92 [65]                                        | 0.76–0.89 [65]                                 | Pain frequency<br>$r = -0.30$ [95% CI] [65]<br>Pain intensity                                                                                                                                                                                       | 3 factors          | -                            | -                     | -                        |



|                                                          |                     |                     |                                                                                                                                                                                                                                                                    |           |                                            |                        |                        |
|----------------------------------------------------------|---------------------|---------------------|--------------------------------------------------------------------------------------------------------------------------------------------------------------------------------------------------------------------------------------------------------------------|-----------|--------------------------------------------|------------------------|------------------------|
|                                                          |                     |                     | <i>r</i> = 0.36 [95% CI] [45]<br>Disease duration<br><i>r</i> = 0.39 (95% CI) [45]                                                                                                                                                                                 |           |                                            |                        |                        |
| <b>Berg Balance Scale (BBS)</b>                          | 0.72 [46]–0.99 [36] | 0.86 [48]–0.98 [66] | Two min walk test:<br><i>r</i> = 0.78(95% CI) [49]<br>10 min walk test:<br><i>r</i> = 0.79(95% CI) [70]<br>Timed up and go<br><i>r</i> = –0.82(95% CI) [69]                                                                                                        | 1 factor  | 53% [33]–91%<br>[34]/82% [68]–<br>96% [34] | 1.49 [29]–2.93<br>[69] | 2.50 [36]–8.10<br>[70] |
| <b>Child Health Assessment Questionnaire (CHAQ)</b>      | -                   | 0.62–0.94 [71]      | -                                                                                                                                                                                                                                                                  | 4 factors | SRM: 0.91–<br>1.28 [72]                    | -                      | -                      |
| <b>Chronic Venous Insufficiency Questionnaire (CVIQ)</b> | 0.81 [73]–0.98 [73] | 0.67 [74]–0.92 [74] | -                                                                                                                                                                                                                                                                  | 4 factors | -                                          | -                      | -                      |
| <b>Client Satisfaction Questionnaire (CSQ)</b>           | 0.41–0.86 [76]      | 0.83–0.85 [77]      | Parent satisfaction questionnaire<br><i>r</i> = 0.52 (95% CI) [77]<br>Parents' benefit rating<br><i>r</i> = 0.47 (95% CI) [78]<br>Global assessment of functioning<br><i>r</i> = 0.37 (95% CI) [78]<br>Therapists' benefit rating<br><i>r</i> = 0.41 (95% CI) [76] | 2 factors | -                                          | -                      | -                      |
| <b>Disease activity score (DAS)</b>                      | 0.61–0.91 [79]      | 0.39 [61]–0.91 [82] | Simplified Ankylosing Spondylitis<br>Disease Activity Score<br><i>r</i> = 0.83 (95% CI) [80]<br>Ankylosing Spondylitis Disease Activity<br>Score<br><i>r</i> = 0.81 (95% CI) [81]<br>Patient's pain rating<br><i>r</i> = 0.59 (95% CI) [81]                        | 1 factor  | -                                          | 3.01–3.66 [81]         | -                      |
| <b>EuroQol-5 Dimension questionnaire (EQ5D)</b>          | -                   | 0.36–0.90 [83]      | UK-SF36<br><i>r</i> = 0.48–0.60 (95% CI) [84]<br>EQ-5D-3L<br><i>r</i> = 0.74 [95% CI] [84]<br>EQ Visual analogue scale<br><i>r</i> = 0.48 [95% CI] [83]                                                                                                            | 5 factors | -                                          | -                      | -                      |
| <b>Falls Efficacy Scale (FES)</b>                        | 0.58 [85]–0.96 [87] | 0.79 [68]–0.96 [88] | Previous falls<br><i>r</i> = 0.46(95% CI) [86]<br>Fatigue<br><i>r</i> = 0.42 (95% CI) [86]<br>Trail making test (Part B)<br><i>r</i> = 0.28 (95% CI) [86]<br>Muscle strength<br><i>r</i> = –0.26 (95% CI) [86]<br>Balance measures<br><i>r</i> = 0.30(95% CI) [86] | 1 factor  | 36% [85]                                   | 0.19 [86]–6.4<br>[85]  | 0.52 [86]–17.7<br>[85] |

|                                                                                         |                                                                                   |                                                                                                         |                                                                                                                                                                                                                                                                                             |                |                                        |                                                                                                 |                                                                                               |
|-----------------------------------------------------------------------------------------|-----------------------------------------------------------------------------------|---------------------------------------------------------------------------------------------------------|---------------------------------------------------------------------------------------------------------------------------------------------------------------------------------------------------------------------------------------------------------------------------------------------|----------------|----------------------------------------|-------------------------------------------------------------------------------------------------|-----------------------------------------------------------------------------------------------|
| <b>Fibromyalgia Impact Questionnaire (FIQ)</b>                                          | 0.31 [92]–0.95 [89]                                                               | 0.80 [91]–0.92 [89]                                                                                     | Health Assessment Questionnaire<br>$r = 0.25–0.67$ (95% CI) [90]<br>Fibromyalgia Health Assessment Questionnaire<br>$r = 0.25–0.70$ (95% CI) [90]<br>Medical Outcomes Survey Short Form36<br>$r = 0.19–0.62$ (95% CI) [90]<br>Symptom Checklist-90-Revised<br>$r = 0.20–0.68$ (95% CI) [90] | 1 factor       | -                                      | -                                                                                               | -                                                                                             |
| <b>Generalized Anxiety Disorder Scale 7 (GAD-7)</b>                                     | 0.83 [92]                                                                         | 0.92 [92]                                                                                               | PHQ-2 depression scale:<br>$r = 0.64$ (95% CI: 0.63–0.66) [92]<br>Rosenberg Self Esteem Scale:<br>$r = 0.43$ (95% CI: 0.41–0.46) [92]<br>Questionnaire on Life Satisfaction:<br>$r = 0.34$ (95% CI: 0.32 to 0.37) [92]<br>Resilience Scale:<br>$r = 0.29$ (95% CI: 0.26 to 0.31) [92]       | 1 factor       | 89%/82% [92]                           | -                                                                                               | -                                                                                             |
| <b>Health Assessment Questionnaire-modified (HAQ-M)</b>                                 | 0.87–0.99 [93]                                                                    | 0.90 [94]                                                                                               | VAS pain [95] (0–3) 0.634<br>Depression [95] (0–9.9) 0.491<br>ESR <sup>4</sup> (mm/h) 0.319<br>Duration <sup>4</sup> (years) 0.22                                                                                                                                                           | -1 factor [93] | -                                      | -                                                                                               |                                                                                               |
| <b>Knee Injury and Osteoarthritis Outcome Score Questionnaire; (KOOS)</b>               | 0.73–0.93 [98]                                                                    | Pain: 0.82 [97]<br>Symptoms: 0.78 [97]<br>ADL: 0.79 [97]<br>Sport/Rec: 0.80 [97]<br>QoL: 0.82 [97]      | SF-36: 0.03–0.74 [99]                                                                                                                                                                                                                                                                       | -              | -                                      | Pain: 2.2 [98]<br>Symptoms: 3.18 [99]<br>ADL: 2.9 [98]<br>Sport/Rec: 2.18 [96]<br>QoL: 206 [98] | Pain: 6.1 [99]<br>Symptoms: 8.5 [99]<br>ADL: 8.0 [99]<br>Sport/Rec: 5.8 [96]<br>QoL: 7.2 [97] |
| <b>Movement Disorder Society - Unified Parkinson's Disease Rating Scale (MDS-UPDRS)</b> | ICC $\geq$ 0.92 - ICC $\geq$ 0.96 [101]                                           | $\alpha \geq$ 0.96 [101]                                                                                | C-reactive protein:<br>$r = 0.004–0.822$ .<br>DextQ-24: $r = 0.50–0.66$ [101]<br>Non-Motor Symptoms Scale: $r = 0.81$ [102]<br>TSK-13: $r = 0.513$ [101]                                                                                                                                    | 4 factors      | 0.94 / 0.70 [101]<br>0.78 / 0.95 [101] | -                                                                                               | -                                                                                             |
| <b>Physical Activity Scale for the Elderly (PASE)</b>                                   | 0.77 [104]                                                                        | 0.71 [107]                                                                                              | Actigraph GT1M -0.30 [103]<br>CHAMPS: $r = 0.58–0.64$ [103]<br>IPAQ - 0.61 [105]<br>SF-36: $r = 0.17–0.30$ [107]<br>YPAS: $r = 0.61$ [107]<br>6MWT: $r = 0.68$ [107]                                                                                                                        | -              | -                                      | 31 [108]                                                                                        | 87 [108]                                                                                      |
| <b>Parkinson's Disease Questionnaire (PDQ39).</b>                                       | Test-Retest: 0.68–0.95 [109]<br>Mobility: 0.89–0.95 [109]<br>ADL: 0.93–0.96 [109] | Test-Retest [91]: 0.84–0.94<br>Mobility: 0.85–0.96<br>ADL: 0.83–0.94<br>Emotional well-being: 0.79–0.91 | EuroQoL-5d: $r = 0.75$ [92]<br>SF-36: $r = 0.34–0.80$ [92]<br>Beck's DI: 0.73 [93]                                                                                                                                                                                                          | -              | -                                      | Mobility: 6.25<br>ADL: 8.54<br>Emotional well-being: 7.26                                       | Mobility: 12.24<br>ADL: 16.72<br>Emotional well-being: 14.22<br>Stigma: 21.21                 |

|                                                                           |                                                                                                                                                                                                           |                                                                                                                                   |                                                                                                                                                 |             |           |                                                                                                                      |                                                                         |
|---------------------------------------------------------------------------|-----------------------------------------------------------------------------------------------------------------------------------------------------------------------------------------------------------|-----------------------------------------------------------------------------------------------------------------------------------|-------------------------------------------------------------------------------------------------------------------------------------------------|-------------|-----------|----------------------------------------------------------------------------------------------------------------------|-------------------------------------------------------------------------|
|                                                                           | Emotional well-being: 0.90–0.95 [109]<br>Stigma: 0.88–0.95 [109]<br>Social Support: 0.66–0.92 [109]<br>Cognition: 0.84–0.93 [109]<br>Communication: 0.86–0.90 [109]<br>Bodily discomfort: 0.80–0.91 [109] | Stigma: 0.54–0.90<br>Social Support: 0.13–0.87<br>Cognition: 0.6–0.87<br>Communication: 0.65–0.87<br>Bodily discomfort: 0.56–0.87 |                                                                                                                                                 |             |           | Stigma: 10.82<br>Social Support: 24.50<br>Cognition: 11.29<br>Communication: 10.74<br>Bodily discomfort: 12.49 [112] | Social Support: 24.50<br>Cognition: 22.12<br>Communication: 24.48 [112] |
| <b>Quebec Back Pain Disability (QBPDS-PT)</b>                             | 0.86–0.99 [113]                                                                                                                                                                                           | 0.895–0.96 [113]                                                                                                                  | RMDQ: 0.60–0.70 [113]<br>ODI: 0.68–0.81 [113]<br>VAS: 0.37–0.87 [113]<br>SF-36: 0.64–0.69 [113]                                                 | 1–7 factors | -         | -                                                                                                                    | 11.04–32.9 [113]                                                        |
| <b>Short-Form 12 (SF-12)</b>                                              | 0.60–0.78 [114]                                                                                                                                                                                           | 0.82–0.88 [114]                                                                                                                   | EuroQoL: $r = 0.38$ –0.61 [114]                                                                                                                 | 8 Factors   | 70% [114] | -                                                                                                                    | 3.77 [114]                                                              |
| <b>Short-Form 36 (SF-36)</b>                                              | 0.71–0.89 [114]<br>0.72–0.87 [115]                                                                                                                                                                        | 0.74–0.93 [115]<br>0.76–0.98 [116]                                                                                                | QOL-DAV2.0: 0.42–0.75 [118]<br>NMS: 0.40–0.52 [118]<br>WHO-DAS II: 0.52–0.70 [119]<br>EuroQoL: 0.66 [119]<br>Barthel Index: 0.217–0.810 [118]   | 8 Factors   | -         | 1.2–3.5 [117]                                                                                                        | 19–45 [118]                                                             |
| <b>Tampa Scale of Kinesiophobia. (TSK-13)</b>                             | 0.90 [120]                                                                                                                                                                                                | 0.94 [120]                                                                                                                        | PCS: $r = 0.54$ [120]<br>FES: $r = 0.710$ [120]<br>TSK-13: $r = 513$ [120]<br>HADS: $r = 0.443$ –0.626 [120]<br>SF-36: $r = 0.236$ –0.563 [120] | 2 factors   | -         | -                                                                                                                    | 10.7 [120]                                                              |
| <b>Venous Clinical Severity Score; (VCSS)</b>                             | 0.92 [121]                                                                                                                                                                                                | $\kappa = 0.68$ [121]                                                                                                             | CIVIQ: $r = 0.30$ –0.55 [121]<br>CEAP: $r = 0.21$ –0.51 [121]                                                                                   | -           | -         | -                                                                                                                    | -                                                                       |
| <b>Western Ontario McMaster Universities Osteoarthritis Index (WOMAC)</b> | 0.77 [124]–0.98 [123]                                                                                                                                                                                     | 0.84 [124]–0.98 [122]                                                                                                             | SF-36: $r = 0.67$ –0.73 [125]<br>COAT-Scale: $r = 0.92$ [124]                                                                                   | -           | -         | 124                                                                                                                  | 3.94 [104]–15.3 [123]                                                   |

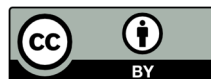

© 2020 by the authors. Licensee MDPI, Basel, Switzerland. This article is an open access article distributed under the terms and conditions of the Creative Commons Attribution (CC BY) license (<http://creativecommons.org/licenses/by/4.0/>).
